# Supplementary material for: Synthesis, characterization, in vitro cytotoxicity, in silico ADMET analysis and interaction studies of 5-dithiocarbamato-1,3,4-thiadiazole-2-thiol and its zinc(ii) complex with human serum albumin: combined spectroscopy and molecular docking investigations
Source: Royal Society of Chemistry journal article supplement (doi:10.1039/c6ra17322e), 2016-01-01
Supplement: c6ra17322e1.pdf [file c6ra17322e1.pdf]

## Supplementary Material

### **Synthesis, characterization, *in vitro* cytotoxicity, *in silico* ADMET analysis and interaction studies of 5-dithiocarbamate-1,3,4-thiadiazole-2-thiol and its Zinc(II) Complex with Human Serum Albumin: Combined spectroscopy and molecular docking investigations**

Fereshteh.Shiri<sup>a,\*</sup>, Somaye Shahraki<sup>a</sup>, Sadegh Baneshi<sup>a</sup>, Massoud Nejati-Yazdinejad<sup>a</sup>, Mostafa Heidari Majd<sup>b</sup>

<sup>a</sup>Department of Chemistry, University of Zabol, P.O. Box 98615-538, Zabol, Iran.

<sup>b</sup>Faculty of Pharmacy, Zabol University of Medical Sciences, Zabol, Iran

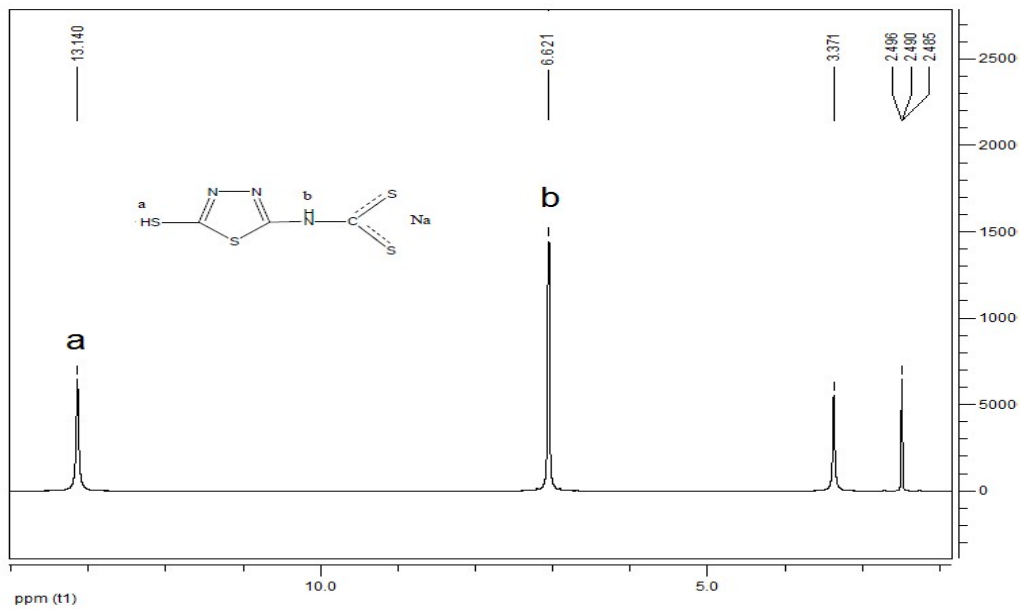

Figure 1S

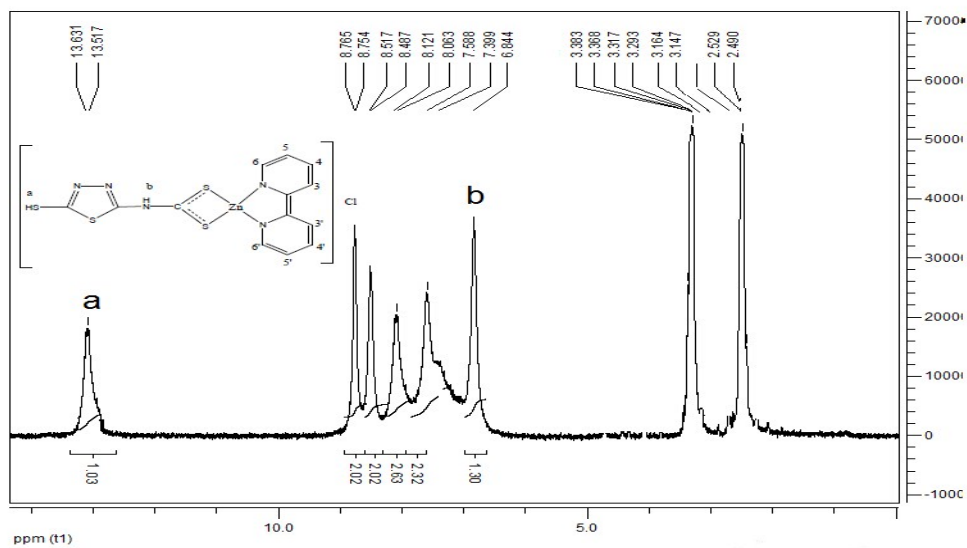

Figure 2S

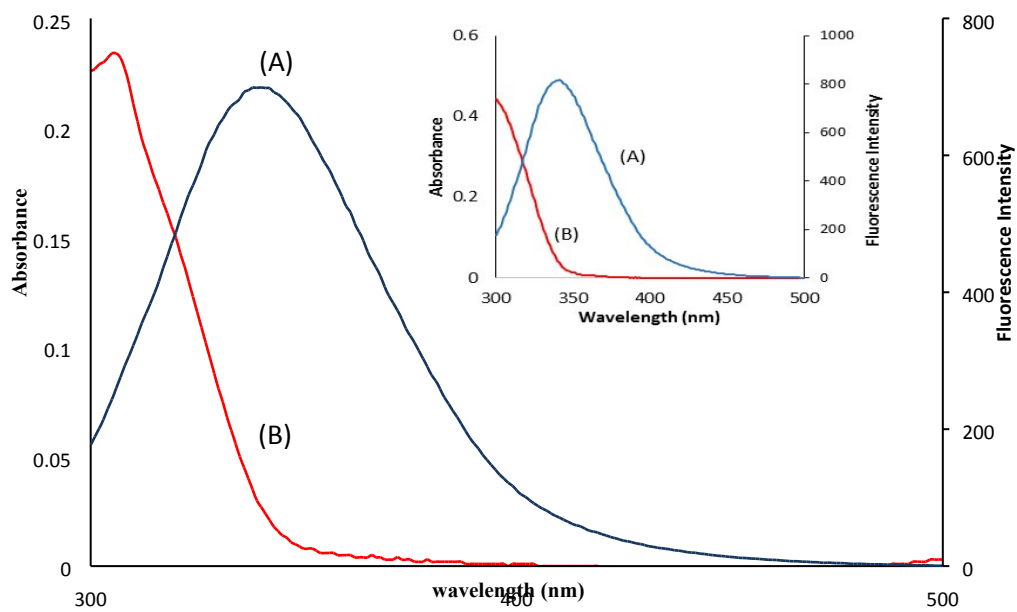

Figure 3S

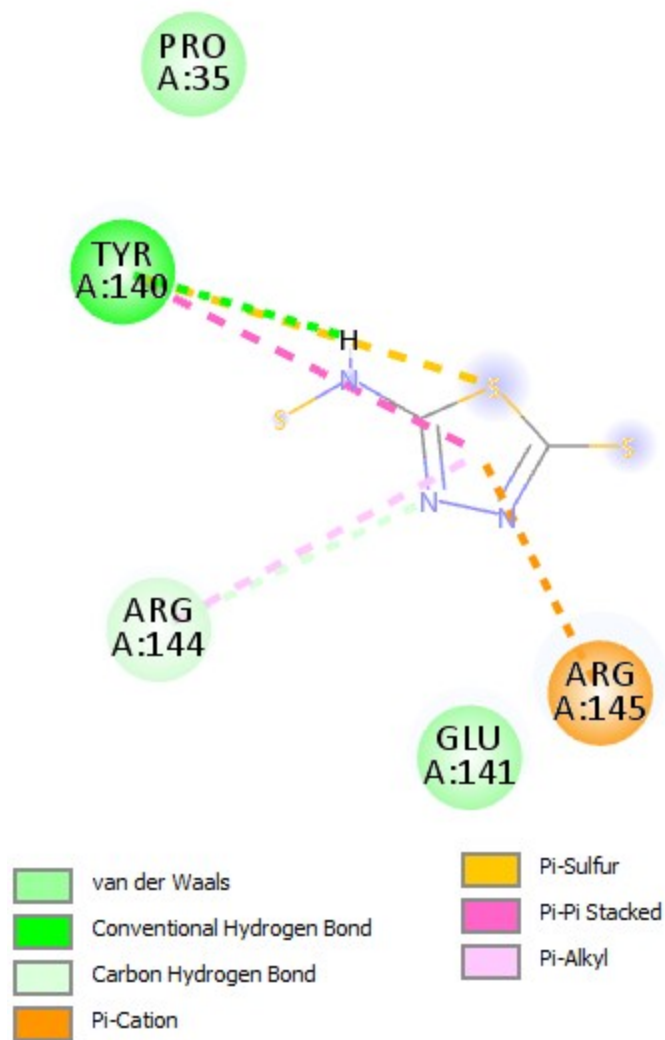

Figure 4S(A)

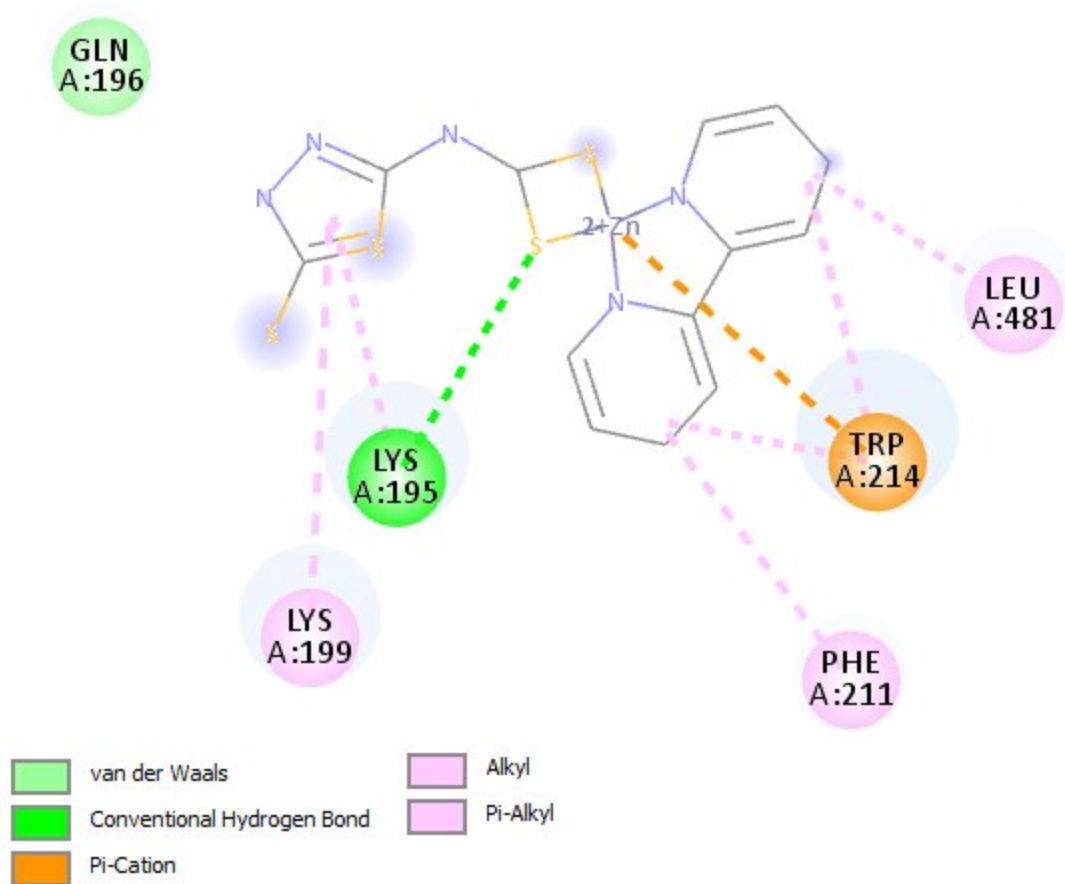

Figure 4S(B)

**Figure 1S.**  $^1\text{H}$  NMR spectrum (DMSO- $d_6$ , 500 MHz) of dithiocarbamate ligand.

**Figure 2S.**  $^1\text{H}$  NMR spectrum (DMSO- $d_6$ , 500 MHz) Zn(II) complex.

**Figure 3S.** Spectral overlap between the fluorescence emission spectrum of HSA (10  $\mu\text{M}$ ) (A) and absorption spectrum of Zn complex (10  $\mu\text{M}$ ), Insert for dithiocarbamate ligand (10  $\mu\text{M}$ ), at 310 K.

**Figure 4S.** Two-dimensional scheme of interactions between the Ligand (A), Complex (B) and HSA. Only the more important residues for binding are shown.

Table 1S. Prediction of ADMET properties

| Parameter              | ligand  | complex |
|------------------------|---------|---------|
| Molweight              | 165.265 | 430.919 |
| LogP                   | 0.5163  | 2.8386  |
| LogS                   | -3.752  | -4.458  |
| H-Acceptors            | 3       | 5       |
| H-Donors               | 1       | 1       |
| Polar Surface Area     | 119.65  | 137.93  |
| Mutagenic              | none    | none    |
| Tumorigenic            | none    | none    |
| Reproductive Effective | none    | none    |
| Irritant               | none    | none    |

Table 2S. Smina score of HSA with different conformers of ligand and complex

| Ligand |                     | Complex |                     |
|--------|---------------------|---------|---------------------|
| Pose   | Affinity (kcal/mol) | Pose    | Affinity (kcal/mol) |
| 1      | -4.3                | 1       | -8.1                |
| 2      | -4.0                | 2       | -7.6                |
| 3      | -4.0                | 3       | -7.3                |
| 4      | -4.0                | 4       | -7.2                |
| 5      | -3.9                | 5       | -7.2                |
| 6      | -3.9                | 6       | -7.0                |
| 7      | -3.8                | 7       | -6.9                |
| 8      | -3.8                | 8       | -6.8                |
| 9      | -3.7                | 9       | -6.7                |
